# Supplementary material
Source: MDPI journal article supplement (https://www.mdpi.com/2071-1050/15/3/2464)
Supplement: s1 [file s1]

**Evaluation matrix of external factors of tourism development of West Lake.**

| Row | Key External Factors                                                                                             | Score                                 |                    |                      |                          |                         |
|-----|------------------------------------------------------------------------------------------------------------------|---------------------------------------|--------------------|----------------------|--------------------------|-------------------------|
|     |                                                                                                                  | Importance factor<br>(from zero to 1) | Weak reaction<br>1 | Medium reaction<br>2 | Above average reaction 3 | Excellent reaction<br>4 |
|     | Opportunities                                                                                                    |                                       |                    |                      |                          |                         |
| 1   | Increasing the private sector's willingness to participate in tourism-related initiatives and programs           |                                       |                    |                      |                          |                         |
| 2   | Space for guests to utilize the lake and its diverse pools                                                       |                                       |                    |                      |                          |                         |
| 3   | People's desire to maintain and utilize more of the lake's natural and pristine environment                      |                                       |                    |                      |                          |                         |
| 4   | Increased popularity and internationalization of the West Lake                                                   |                                       |                    |                      |                          |                         |
| 5   | Increasing travel and recreation motivation among individuals, in the post-epidemic era                          |                                       |                    |                      |                          |                         |
| 6   | The 2022 Asian Games in Hangzhou is just around the corner                                                       |                                       |                    |                      |                          |                         |
|     | Threats                                                                                                          |                                       |                    |                      |                          |                         |
| 1   | Escalating environmental issues attributable to tourism activity                                                 |                                       |                    |                      |                          |                         |
| 2   | Existence of competitive recreational and tourist areas in the vicinity and tourist appeal by other regions      |                                       |                    |                      |                          |                         |
| 3   | Not adhering to health regulations and polluting lake water                                                      |                                       |                    |                      |                          |                         |
| 4   | Improper protection of the lake's historical attractions                                                         |                                       |                    |                      |                          |                         |
| 5   | Excessive visitor traffic and environmental, health, and transportation stresses on popular tourist destinations |                                       |                    |                      |                          |                         |
| 6   | Tourism supply is insufficient, the target audience is single                                                    |                                       |                    |                      |                          |                         |

**Evaluation matrix of Internal factors of tourism development of West Lake.**

| Row        | Key Internal Factors                                                                                                          | Importance factor<br>(from zero to 1) | Score              |                      |                          |                         |
|------------|-------------------------------------------------------------------------------------------------------------------------------|---------------------------------------|--------------------|----------------------|--------------------------|-------------------------|
|            |                                                                                                                               |                                       | Weak reaction<br>1 | Medium reaction<br>2 | Above average reaction 3 | Excellent reaction<br>4 |
| Strengths  |                                                                                                                               |                                       |                    |                      |                          |                         |
| 1          | Favorable weather with year-round accessibility                                                                               |                                       |                    |                      |                          |                         |
| 2          | Existence of diverse tourism amenities on the lake's coasts                                                                   |                                       |                    |                      |                          |                         |
| 3          | The lake's historical and cultural significance                                                                               |                                       |                    |                      |                          |                         |
| 4          | Numerous sporting and amusement venues surrounding the lake                                                                   |                                       |                    |                      |                          |                         |
| 5          | It is located in an attractive city with convenient transportation                                                            |                                       |                    |                      |                          |                         |
| 6          | Superior natural conditions of the area                                                                                       |                                       |                    |                      |                          |                         |
| 7          | The first 5A scenic spot open for free in China                                                                               |                                       |                    |                      |                          |                         |
| Weaknesses |                                                                                                                               |                                       |                    |                      |                          |                         |
| 1          | Absence of adequate frameworks for travelers' optimal use of tourism resources, particularly in natural and protected regions |                                       |                    |                      |                          |                         |
| 2          | Tourists' disregard for hygiene surrounding the lake                                                                          |                                       |                    |                      |                          |                         |
| 3          | Seasonality of tourism demand                                                                                                 |                                       |                    |                      |                          |                         |
| 4          | The scenery of the West Lake is seasonal                                                                                      |                                       |                    |                      |                          |                         |
| 5          | Aging tourist routes                                                                                                          |                                       |                    |                      |                          |                         |
| 6          | Congestion at West Lake' popular scenic spots                                                                                 |                                       |                    |                      |                          |                         |
